# Supplementary material
Source: PubMed Central journal article supplement (PMC1595438)

**A**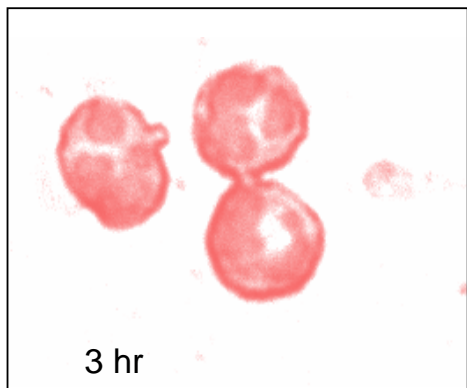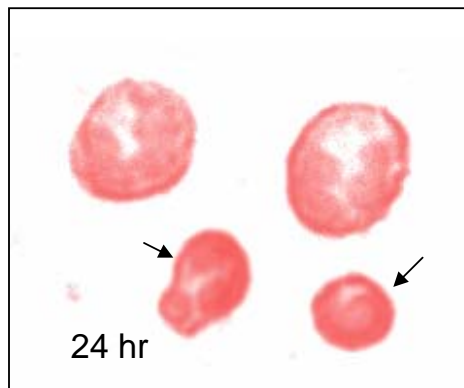**B**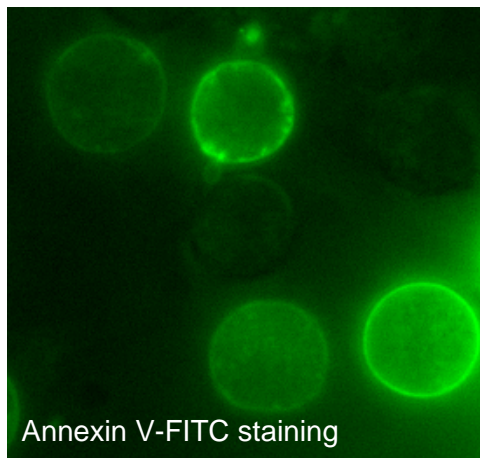**C**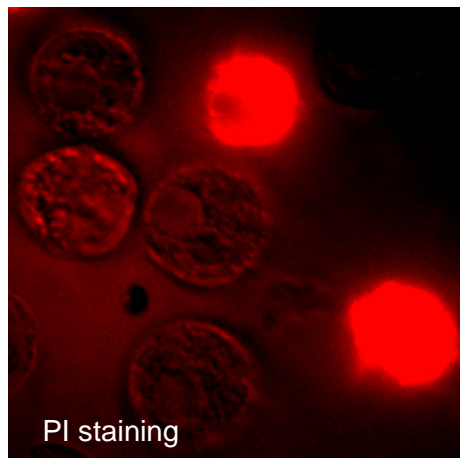

Supplement: pnas_0605722103_1.pdf [file pnas_0605722103_1.pdf]

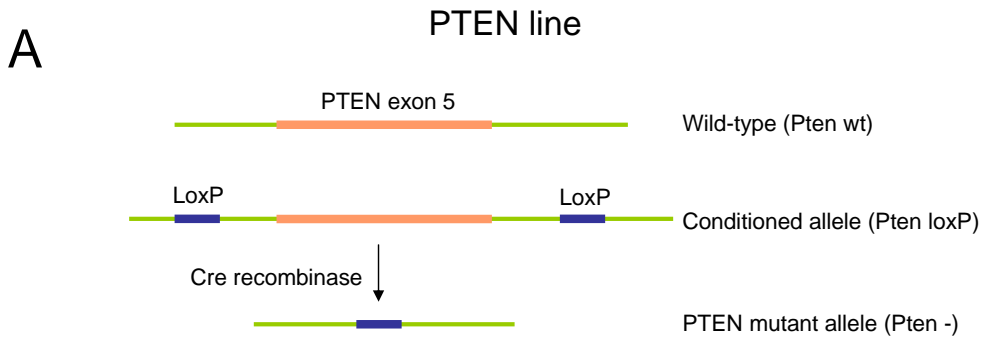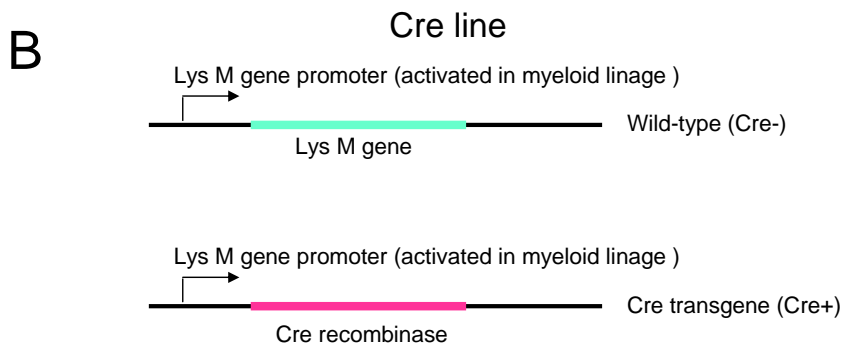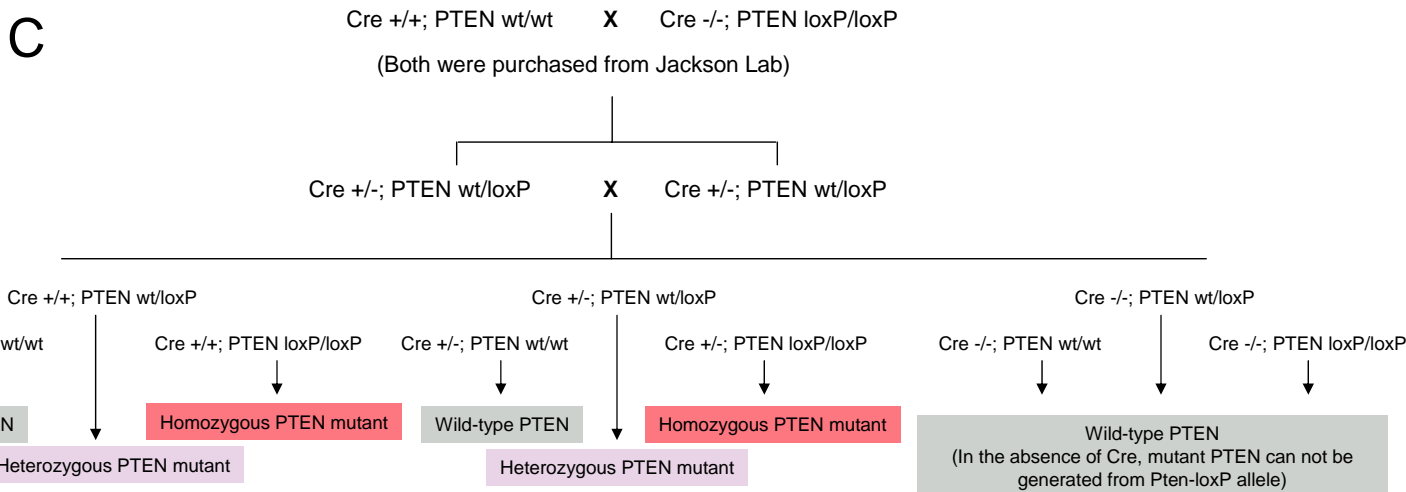

Supplement: pnas_0605722103_2.pdf [file pnas_0605722103_2.pdf]
